# Supplementary material for: 6-Bromoindirubin-3′-oxime intercepts GSK3 signaling to promote and enhance skeletal muscle differentiation affecting miR-206 expression in mice
Source: PubMed Central journal article supplement (PMC6889408; doi:10.1038/s41598-019-54574-4), 2019-12-02
Supplement: 41598_2019_54574_MOESM2_ESM.pdf [file 41598_2019_54574_MOESM2_ESM.pdf]

## Supplementary Figure Tables

### 6-Bromoindirubin-3'-oxime intercepts GSK3 signaling to promote and enhance skeletal muscle differentiation affecting miR-206 expression in mice

Elvira Ragozzino<sup>¶1</sup>, Mariarita Brancaccio<sup>¶1,2</sup>, Antonella Di Costanzo<sup>1</sup>, Francesco Scalabri<sup>1</sup>, Gennaro Andolfi<sup>‡</sup>, Luca G. Wanderlingh<sup>1\*</sup>, Eduardo J. Patriarca<sup>‡</sup>, Gabriella Minchiotti<sup>‡</sup>, Sergio Altamura<sup>§†</sup>, Francesca Varrone<sup>1\*±</sup> & Vincenzo Summa<sup>§±</sup>

**Table S1: Oligonucleotide primers used in sample preparation for qRT-PCR**

|             |                                             |                                        |
|-------------|---------------------------------------------|----------------------------------------|
| CyclinD1    | Fwd: TCAAGTGTGACCCGGACTG                    | Rev: GGGGGAGAGGGCACATTAAG              |
| MyoD1       | Fwd: AGCACGCACACTTCTCTACT                   | Rev: GGCCTCATTCACTTTGCTCA              |
| β-Catenin   | Fwd: GTCTGAGGACAAGCCACAGGACTAC              | Rev: AATGTCCAGTCCGAGATCA GCA           |
| Myogenin    | Fwd: TGAGTTCAGCAGCCATGAGT                   | Rev: CTCGCCACAAGACAGATG                |
| Pax 7       | Fwd: GAGCACTCGGCTAATCGAAC                   | Rev: CCGTGTTTCTCATGTTGTG               |
| Utrophin    | Fwd: ACCAGCTGGACCGATGGA                     | Rev: CTCGTCCCAGTCGAAGAGATCT            |
| Calcineurin | Fwd: AAGCTCTTTGAAGTGGGAGG                   | Rev: CATTTCAAAGTCCTCCAGG               |
| TGF-β       | Fwd: TGCGCTTG CAGAGATTA AAA                 | Rev: CTGCCGTACAACCTCCAGTGA             |
| FST         | Fwd: ACAAGAAGAATAAACCCCGCT                  | Rev: GTACTTCTAGTTCGGGCTGC              |
| Myh2        | Fwd: TGAGTTCAGCAGCCATGAGT                   | Rev: CTCGCCACAAGACAGATG                |
| Myostatin   | Fwd: CTCAGACCCGTCAAGACTCC                   | Rev: CTCTGCCAAATCAATACCAAGTGCC         |
| MRF4        | Fwd: ATCAGCTACATTGAGCGTCTACA                | Rev: CCTGGAATGATCCGAAACACTTG           |
| MuRF-2      | Fwd: CCGCTCGAGCCACCATGAGCACTTCTCTGAATTACAAG | Rev: TTTTCCGGGCACCTTCATTTAGGGAATTCAACC |
| Cullin-1    | Fwd: CAGCTCCACCATCAACATCAAC                 | Rev: AGTGCTGCTGGCATACACATT             |
| FBXW7       | Fwd: AAAGAGTTGTTAGCGGTTCTCG                 | Rev: CCACATGGATACCATCAAACCTG           |
| β-TrCP1     | Fwd: CCCCAACTGACATTACCC                     | Rev: TCGAATACAACGCACCAA                |
| GAPDH       | Fwd: GGAGCCAAACGGTTCATCAT                   | Rev: TCACGCCACATCTTCCAGA               |
